# Supplementary material for: An automated voxel-based method for calculating the reference value for a brain tumour metabolic index using 18F-FDG-PET and 11C-methionine PET
Source: Ann Nucl Med. 2017 Feb 13;31(3):250–9. doi: 10.1007/s12149-017-1153-8 (PMC5352759; doi:10.1007/s12149-017-1153-8)
Supplement: Supplementary file 1 — Supplementary material 1 (XLSX 20 KB) [file 12149_2017_1153_MOESM1_ESM.xlsx]

## Sheet: Sheet1
An automated voxel-based method for calculating the reference value for a brain tumour metabolic index using 18F-FDG PET and 11C-Methionine PET
Annals of nuclear medicine
Miwako Takahashi1, Tsutomu Soma1,2, Akitake Mukasa3, Keitaro Koyama1, Takuya Arai1, Toshimitsu Momose1
Division of Nuclear medicine, Department of Radiology, Graduate School of Medicine, The University of Tokyo, 3-1 Hongo 7-Chome, Bunkyo-ku, Tokyo 113-8655, Japan
Corresponding author: Miwako Takahashi Email: tmiwako-tky@umin.ac.jp
Online Resorce 1. The original data of N-values determined by each 3 operators using the manual ROI method and those by the automated method, and resulting T/N values
Group 2	N-value of FDG-PET [SUV]				Tumour* [SUV]		Group 2	T/N value of FDG-PET
Pt#	Operator 1	Operator 2	Operator 3	Automated method			Pt#	Operator 1	Operator 2	Operator 3	Automated method
1	8.53775	8.66525	8.83225	8.41035	7.287		1	0.853504	0.840945	0.825045	0.866432
2	9.37	8.7485	9.31875	8.23624	5.074		2	0.541515	0.579985	0.544494	0.616058
3	5.05625	5.121	5.3205	5.12721	4.955		3	0.979975	0.967584	0.931303	0.966412
4	5.5025	4.66325	5.475	6.04722	12.738		4	2.31495	2.73157	2.32658	2.10642
5	7.16175	6.77375	6.79075	6.90754	5.93		5	0.82801	0.875438	0.873247	0.858482
6	11.4245	11.1258	11.7562	10.0654	4.793		6	0.419537	0.430802	0.407698	0.476188
7	10.9053	10.1702	11.1627	10.9046	4.736		7	0.434286	0.465672	0.424268	0.434314
8	8.082	7.57475	7.9695	7.77759	4.253		8	0.526231	0.561471	0.53366	0.546828
9	10.4087	9.48175	9.647	9.35697	6.466		9	0.621208	0.681942	0.67026	0.691035
10	11.357	9.76375	11.6295	10.2551	3.581		10	0.315312	0.366765	0.307924	0.349193
11	7.423	6.9595	8.08575	7.70412	8.705		11	1.17271	1.25081	1.07659	1.12992
12	13.1655	12.43	13.0305	11.8943	5.978		12	0.454066	0.480933	0.45877	0.502592
Group 2	N-value of MET-PET [SUV]				Tumour* [SUV]		Group 2	T/N value of MET-PET
Pt#	Operator 1	Operator 2	Operator 3	Automated method			Pt#	Operator 1	Operator 2	Operator 3	Automated method
1	1.228	1.33225	1.222	1.18	4.254		1	3.46417	3.19309	3.48118	3.60508
2	1.33625	1.34325	1.32675	1.25	0.987		2	0.738634	0.734785	0.743923	0.7896
3	1.01275	0.9805	0.91425	0.94	2.67		3	2.63639	2.7231	2.92043	2.84043
4	1.1455	1.0885	1.17175	1.26	4.6		4	4.01571	4.226	3.92575	3.65079
5	1.3495	1.217	1.40925	1.42	4.987		5	3.69544	4.09778	3.53876	3.51197
6	1.31125	1.20275	1.2735	1.31	1.959		6	1.49399	1.62877	1.53828	1.49542
7	1.408	1.26575	1.37975	1.35	1.055		7	0.74929	0.833498	0.764631	0.781481
8	1.24225	1.04175	1.09	1.14	1.436		8	1.15597	1.37845	1.31743	1.25965
9	1.51325	1.3745	1.40325	1.36	4.5		9	2.97373	3.27392	3.20684	3.30882
10	1.345	1.26525	1.277	1.3	5.109		10	3.79851	4.03794	4.00078	3.93
11	1.4935	1.3155	1.57025	1.52	3.017		11	2.02009	2.29342	1.92135	1.98487
12	1.401	1.37725	1.38125	1.21	2.182		12	1.55746	1.58432	1.57973	1.80331
Group 3	N-value of FDG-PET [SUV]				Tumour* [SUV]		Group 3	T/N value of FDG-PET
Pt#	Operator 1	Operator 2	Operator 3	Automated method			Pt#	Operator 1	Operator 2	Operator 3	Automated method
1	5.4395	5.36775	5.29675	5.53469	3.885		1	0.71422	0.723767	0.733469	0.701937
2	6.367	6.1255	6.45225	6.21824	3.505		2	0.550495	0.572198	0.543221	0.563664
3	14.48	13.2067	14.3237	13.0661	6.519		3	0.450207	0.493611	0.455118	0.498924
4	9.58225	9.13175	9.02475	9.28398	5.624		4	0.586919	0.615873	0.623175	0.605774
5	6.185	5.47625	5.907	6.07141	5.222		5	0.844301	0.953572	0.884036	0.860096
6	7.271	6.55875	7.19825	6.96134	5.306		6	0.729748	0.808996	0.737124	0.762209
7	6.27825	6.05625	6.247	6.12962	4.138		7	0.659101	0.683261	0.662398	0.675082
8	8.708	8.5075	8.031	8.94374	6.754		8	0.775609	0.793888	0.840991	0.755165
9	9.58725	8.8425	9.46775	9.33336	19.819		9	2.06722	2.24133	2.09332	2.12346
10	4.9895	4.591	5.03175	5.12348	3.641		10	0.729732	0.793073	0.723605	0.71065
11	10.6158	9.7325	10.0213	9.73942	6.01		11	0.56614	0.617519	0.599726	0.61708
12	9.7955	8.39175	9.35675	8.74807	11.608		12	1.18503	1.38326	1.2406	1.32692
13	5.65975	5.28675	5.8115	6.0507	5.825		13	1.0292	1.10181	1.00232	0.962699
Group 3	N-value of MET-PET [SUV]				Tumour* [SUV]		Group 3	T/N value of MET-PET
Pt#	Operator 1	Operator 2	Operator 3	Automated method			Pt#	Operator 1	Operator 2	Operator 3	Automated method
1	1.9785	1.84175	1.87025	1.86	3.087		1	1.56027	1.67612	1.65058	1.65968
2	1.639	1.6205	1.564	1.64	2.531		2	1.54423	1.56186	1.61829	1.54329
3	1.4975	1.3805	1.451	1.36	6.83		3	4.56093	4.94748	4.7071	5.02206
4	1.44225	1.47	1.443	1.5	2.765		4	1.91714	1.88095	1.91615	1.84333
5	1.4925	1.35075	1.4825	1.39	2.818		5	1.88811	2.08625	1.90084	2.02734
6	1.31625	1.1695	1.29375	1.24	1.876		6	1.42526	1.6041	1.45005	1.5129
7	1.19375	1.10575	1.1355	1.16	1.853		7	1.55225	1.67579	1.63188	1.59741
8	1.67325	1.59575	1.67375	1.65	3.935		8	2.35171	2.46593	2.35101	2.38485
9	1.20925	1.15575	1.1465	1.2	3.683		9	3.04569	3.18668	3.21239	3.06917
10	1.24575	1.111	1.21075	1.24	2.147		10	1.72346	1.93249	1.77328	1.73145
11	2.11425	2.0385	2.09575	1.9	2.94		11	1.39056	1.44224	1.40284	1.54737
12	1.79525	1.76575	1.79425	1.7	4.743		12	2.64197	2.68611	2.64344	2.79
13	1.42775	1.322	1.336	1.32	1.969		13	1.37909	1.48941	1.4738	1.49167
* Tumour (T) value is calculated by placing one circular ROI with 10-mm diameter on the most hottest area of tumour.
